# Supplementary material for: Physical therapy in the intensive care unit: A cross-sectional study of three Asian countries
Source: PubMed Central journal article supplement (PMC10635439; doi:10.1371/journal.pone.0289876), 2023-11-09
Supplement: pone.0289876.s001.pdf [file pone.0289876.s001.pdf]

**S1 Table.** Most commonly implemented PT techniques in the ICU

| <i>n</i> (%)                    | <b>JP</b> (n=76) | <b>PH</b> (n=45) | <b>TW</b> (n=43) | <i>p</i>                  |
|---------------------------------|------------------|------------------|------------------|---------------------------|
| Breathing exercise              | 6 (7.89)         | 35 (77.78)       | 26 (60.47)       | <b>0.000</b> <sup>a</sup> |
| Chest expansion technique       | 7 (9.21)         | 11 (24.44)       | 24 (55.81)       | <b>0.000</b> <sup>a</sup> |
| Incentive Spirometry            | 0 (0)            | 7 (15.56)        | 6 (13.95)        | <b>0.003</b> <sup>a</sup> |
| Forced expiration technique     | 3 (3.95)         | 4 (8.89)         | 3 (6.98)         | 0.541 <sup>b</sup>        |
| Active cycle of breathing       | 3 (3.95)         | 4 (8.89)         | 2 (4.65)         | 0.564 <sup>b</sup>        |
| Autogenic drainage              | 2 (2.63)         | 2 (4.44)         | 0 (0)            | 0.380 <sup>b</sup>        |
| Postural drainage               | 53 (69.74)       | 7 (15.56)        | 6 (13.95)        | <b>0.000</b> <sup>a</sup> |
| Suction technique               | 7 (9.21)         | 1 (2.22)         | 3 (6.98)         | 0.350 <sup>b</sup>        |
| Percussion technique            | 0 (0)            | 6 (13.33)        | 8 (18.6)         | <b>0.000</b> <sup>b</sup> |
| Vibration technique             | 1 (1.32)         | 7 (15.56)        | 6 (13.95)        | <b>0.003</b> <sup>b</sup> |
| Coughing technique              | 8 (10.53)        | 8 (17.78)        | 14 (32.56)       | <b>0.012</b> <sup>b</sup> |
| Huffing technique               | 1 (1.32)         | 4 (8.89)         | 5 (11.63)        | 0.051 <sup>b</sup>        |
| Positioning                     | 34 (44.74)       | 39 (86.67)       | 30 (69.77)       | <b>0.000</b> <sup>a</sup> |
| Passive ROM                     | 44 (57.89)       | 42 (93.33)       | 36 (83.72)       | <b>0.000</b> <sup>a</sup> |
| Active-Assisted ROM             | 25 (32.89)       | 36 (80)          | 35 (81.4)        | <b>0.000</b> <sup>a</sup> |
| Active ROM                      | 9 (11.84)        | 31 (68.89)       | 26 (60.47)       | <b>0.000</b> <sup>a</sup> |
| Stretching exercise             | 11 (14.47)       | 21 (46.67)       | 14 (32.56)       | <b>0.000</b> <sup>a</sup> |
| Progressive resistance exercise | 20 (26.32)       | 12 (26.67)       | 2 (4.65)         | <b>0.010</b> <sup>a</sup> |
| Electrotherapy                  | 9 (11.84)        | 32 (71.11)       | 2 (4.65)         | <b>0.000</b> <sup>a</sup> |
| Bicycle ergometer               | 2 (2.63)         | 8 (17.78)        | 3 (6.98)         | <b>0.011</b> <sup>b</sup> |
| Sitting balance & tolerance     | 72 (94.74)       | 26 (57.78)       | 16 (37.21)       | <b>0.000</b> <sup>a</sup> |
| Standing balance & tolerance    | 48 (63.16)       | 13 (28.89)       | 8 (18.6)         | <b>0.000</b> <sup>a</sup> |
| Ambulation training             | 30 (39.47)       | 8 (17.78)        | 2 (4.65)         | <b>0.000</b> <sup>a</sup> |
| Others                          | 3 (3.95)         | 1 (2.22)         | 4 (9.3)          | 0.267 <sup>b</sup>        |

n, number; %, percentage; \*, frequency based on those who answered 'yes'; #, multiple answer; JP, Japan; PH, Philippines; TW, Taiwan; ICU, Intensive Care Unit; PT, Physical Therapy; bolded numbers signify  $p < 0.05$

<sup>a</sup> Pearson Chi-Square Test

<sup>b</sup> Fisher's Exact Test
