# Supplementary material for: Physical therapy in the intensive care unit: A cross-sectional study of three Asian countries
Source: PubMed Central journal article supplement (PMC10635439; doi:10.1371/journal.pone.0289876), 2023-11-09
Supplement: pone.0289876.s002.pdf [file pone.0289876.s002.pdf]

**S2 Table.** Challenges in the delivery of PT services in the ICU

| <i>n</i> (%)                                            | JP (n=76)  | PH (n=45)  | TW (n=43)  | <i>p</i>                  | <i>p</i> <sup>c</sup> |
|---------------------------------------------------------|------------|------------|------------|---------------------------|-----------------------|
| No direct access to ICU patients                        | 39 (51.32) | 9 (20)     | 8 (18.6)   | <b>0.000</b> <sup>a</sup> | 0.0502                |
| PT-ICU patient ratio                                    | 25 (32.89) | 8 (17.78)  | 8 (18.6)   | 0.095 <sup>a</sup>        | 0.2272                |
| Little-to-no training prior to ICU duty                 | 44 (57.89) | 21 (46.67) | 21 (48.84) | 0.333 <sup>a</sup>        | <b>0.0084</b>         |
| Decreased PT ICU exposure                               | 3 (3.95)   | 16 (35.56) | 14 (32.56) | <b>0.000</b> <sup>a</sup> | <b>0.0103</b>         |
| Little-to-no autonomy in treatment modification         | 5 (6.58)   | 10 (22.22) | 6 (13.95)  | <b>0.044</b> <sup>a</sup> | 0.0854                |
| Limited PT knowledge allowed to conduct to ICU patients | 12 (15.79) | 9 (20)     | 13 (30.23) | 0.173 <sup>a</sup>        | 0.1510                |
| Provision of PT by ICU nurses instead of PTs perse      | 6 (7.89)   | 8 (17.78)  | 1 (2.33)   | <b>0.043</b> <sup>b</sup> | 0.8885                |
| Delayed PT service provision                            | 6 (7.89)   | 8 (17.78)  | 8 (18.6)   | 0.155 <sup>a</sup>        | 0.1127                |

n, number; %, percentage; #, multiple answer; JP, Japan; PH, Philippines; TW, Taiwan; ICU, Intensive Care Unit; PT, Physical Therapy; PTs, physical therapist; bolded numbers signify  $p < 0.05$

<sup>a</sup> Pearson Chi-Square Test

<sup>b</sup> Fisher's Exact Test

<sup>c</sup> Using logistic regression with adjustment of age, highest educational attainment, and work experience as physiotherapist
